# Supplementary material for: Engineering a CRISPR Interference System To Repress a Class 1 Integron in Escherichia coli
Source: PubMed Central journal article supplement (PMC7038292; doi:10.1128/aac.01789-19), 2020-02-21
Supplement: AAC.01789-19-s0001.pdf [file AAC.01789-19-s0001.pdf]

## Supplemental Material

# Engineering CRISPR Interference System to Repress Class 1 Integron in *E. coli*

Qingyang Li<sup>a</sup>, Peng Zhao<sup>b</sup>, Lili Li<sup>c</sup>, Haifeng Zhao<sup>a</sup>, Lei Shi<sup>c\*</sup>, Pingfang Tian<sup>b\*</sup>

<sup>a</sup> School of Food Sciences and Technology, South China University of Technology, Guangzhou 510641, China

<sup>b</sup> College of Life Science and Technology, Beijing University of Chemical Technology, Beijing 100029, China

<sup>c</sup> Institute of Food Safety and Nutrition, Jinan University, Guangzhou 510632, China

\*Corresponding author

E-mail: leishi@jnu.edu.cn (LS)

E-mail: tianpf@mail.buct.edu.cn (PT)

1 **Legends**

2 **Fig. S1 Partial sequencing results of seven CRISPRi recombinant plasmids.** The base-pairing regions of  
3 all CRISPRi recombinant plasmids plv-dCas9-R(0-6) were the same as designed, whereby “R(0-6)”  
4 represent different sgRNAs.

5 **Fig. S2 Partial sequencing results of ARG cassettes integrated into R388 class 1 integron.** (A-B) Partial  
6 sequence of integrated fragment *intI1-attI-aadA1* (A) or *intI1-attI-aadB* (B) through conjugation from the  
7 control donor *E. coli* C600(R388+plv-dCas9-R0+pINT-cassette) to the recipient *E. coli* J53 without  
8 CRISPRi induction.

9 **Fig. S3 Plasmid loss of the CRISPRi recombinant plasmid plv-dCas9-R3 in serial passage.** (A) Colony  
10 counts were enumerated on LB+CM plates to assess plasmid loss of every ten generations continuously  
11 passaged in liquid medium containing CM. (B) Colony counts were enumerated on LB+CM plates to  
12 determine plasmid loss of every ten generations in serial passage without exposure to CM. CM,  
13 chloramphenicol; G, generation.

14 **Fig. S4 Schematic outline of construction of pINT-cassette.** (A) Sequence of BmgBI-P<sub>tac</sub> for recombinant  
15 plasmid pINT-cassette. (B) Schematic diagram of pINT-cassette. (C-D) The resulting recombinant plasmids  
16 pINT-*aadA1* (C) and pINT-*aadB* (D).

17 **Table S1 Strains and vectors used in this study.**

18 **Table S2 Oligonucleotides and primers used in this study.**

19 **Table S3 IC<sub>50</sub> of TMP and SUL in recombinant *E. coli* with/without aTc induction.**

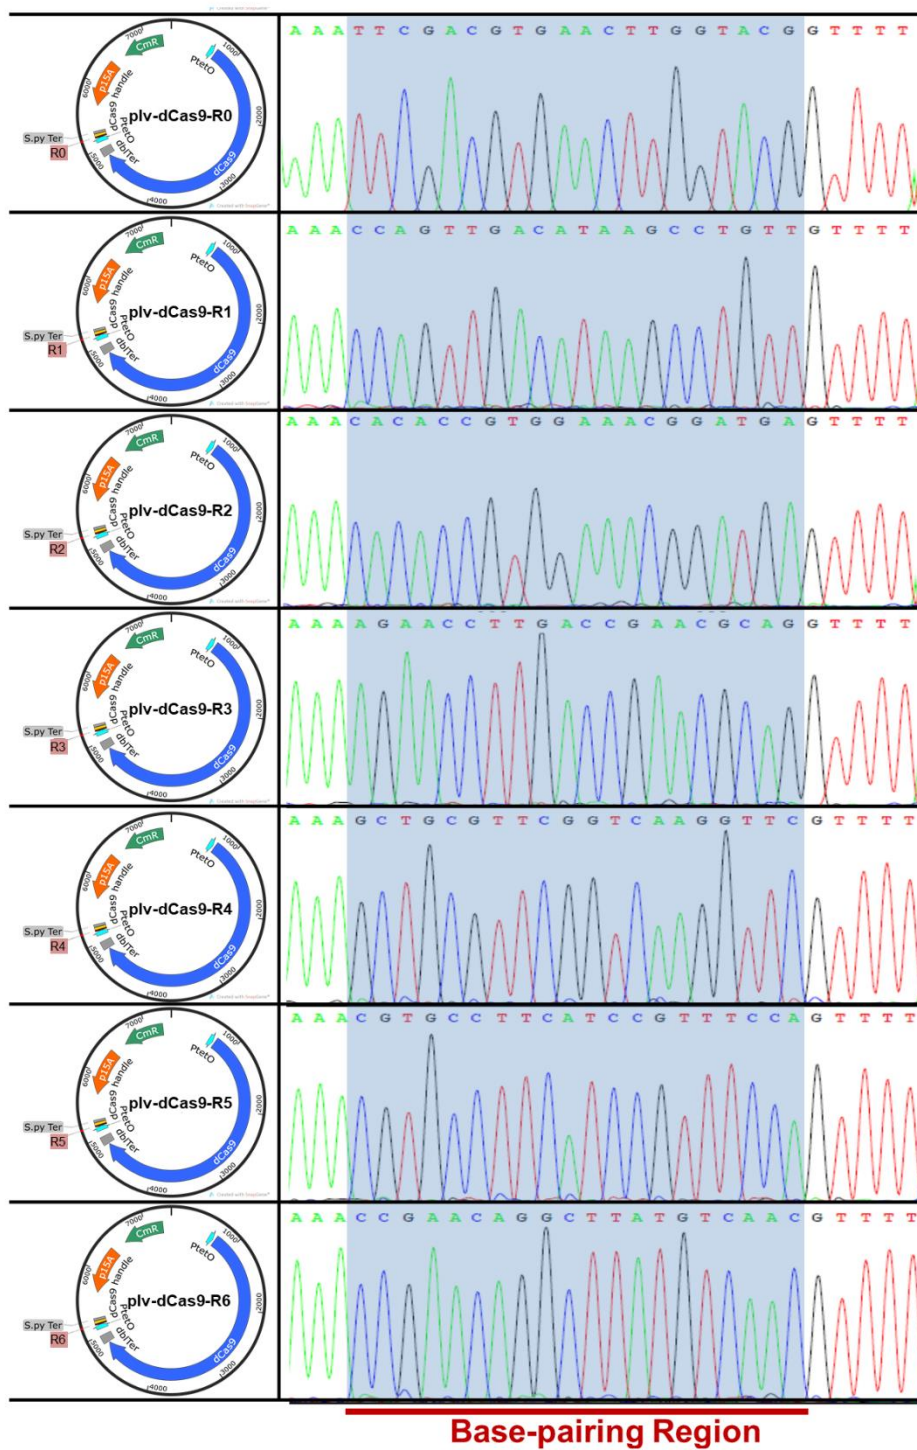

21 **Fig S1 Partial sequencing results of CRISPRi recombinant plasmids.** The base-pairing regions of plv-  
 22 dCas9-R(0-6) were the same as designed, whereby “R(0-6)” represent different sgRNAs.

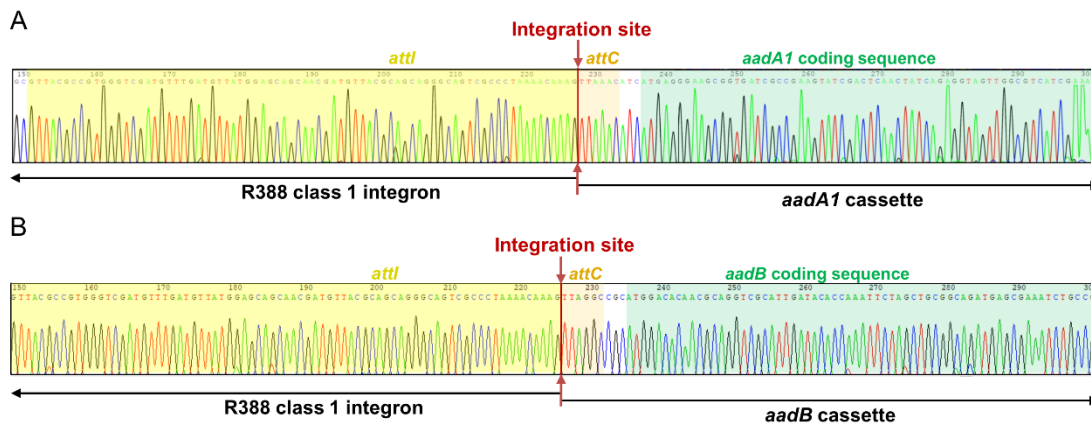

24 **Fig S2 Partial sequencing results of ARG cassettes integrated into R388 class 1 integron. (A-B)** Partial  
 25 sequence of integrated fragment *intI1-attI-aadA1* (A) or *intI1-attI-aadB* (B) through conjugation from the  
 26 control donor *E. coli* C600(R388+pIv-dCas9-R0+pINT-cassette) to the recipient *E. coli* J53 without  
 27 CRISPRi induction.

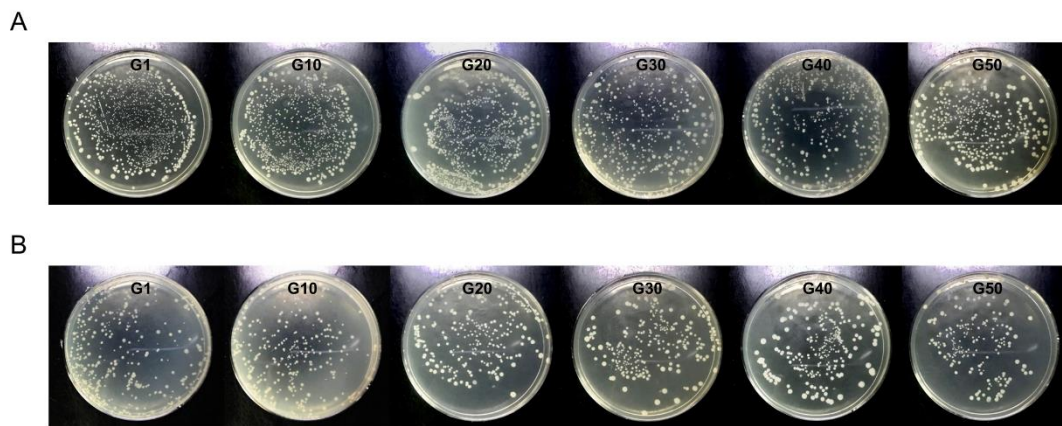

29 **Fig S3 Plasmid loss of CRISPRi recombinant plasmid pIv-dCas9-R3 in serial passage.** (A) Colony  
30 counts were enumerated on LB+CM plates to assess plasmid loss of every ten generations continuously  
31 passaged in liquid medium containing CM. (B) Colony counts were enumerated on LB+CM plates to  
32 determine plasmid loss of every ten generations in serial passage without exposure to CM. CM,  
33 chloramphenicol; G, generation.

A

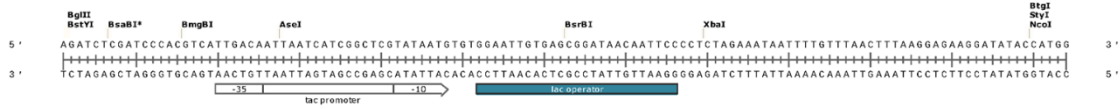

B

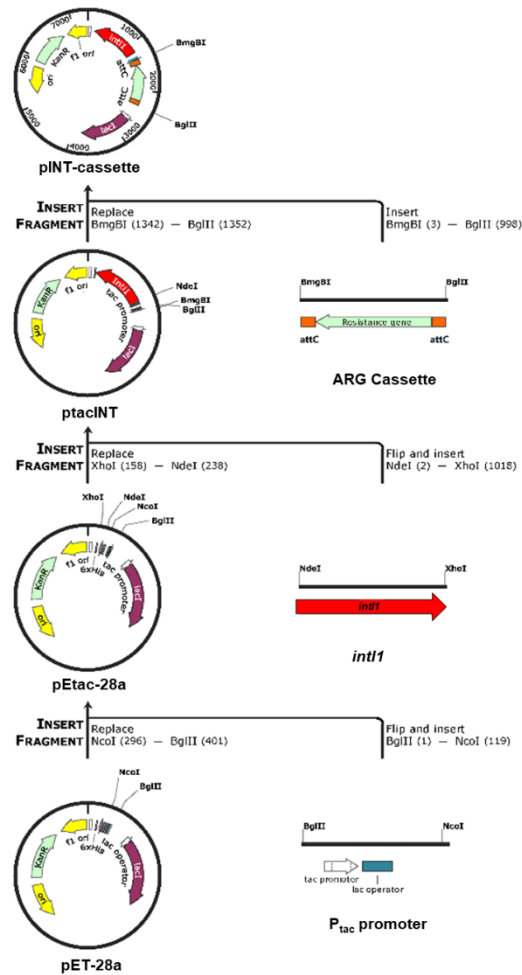

C

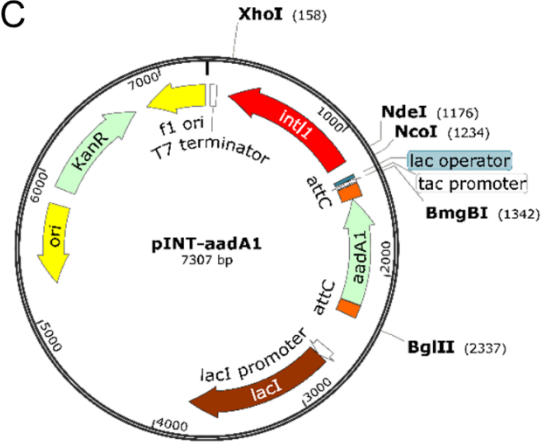

D

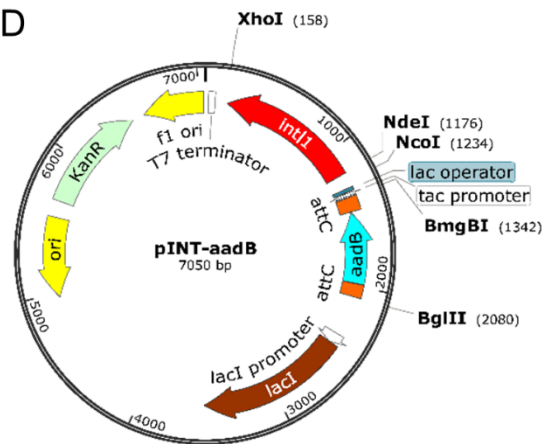

35 **Fig S4 Schematic diagram of construction of pINT-cassette.** (A) Sequence of BmgBI-P<sub>tac</sub> for recombinant  
 36 plasmid pINT-cassette. (B) Schematic diagram of pINT-cassette. (C-D) The resulting recombinant plasmids  
 37 pINT-aadA1 (C) and pINT-aadB (D).

38  
 39  
 40  
 41  
 42  
 43  
 44  
 45  
 46  
 47  
 48  
 49

50 Table S1 Strains and vectors used in this study.

| Vectors/Strains             | Description                                                                                                                        | Source                  |
|-----------------------------|------------------------------------------------------------------------------------------------------------------------------------|-------------------------|
| <b>Vectors</b>              |                                                                                                                                    |                         |
| <b>R388</b>                 | 33 kb conjugative plasmid containing a class 1 integron with <i>dfrB2-orfA</i> cassette array, TMP <sup>R</sup> , SUL <sup>R</sup> | (1) Stokes & Hall, 1989 |
| <b>plv-dCas9-sgRNA</b>      | CRISPRi encoding vector, CM <sup>R</sup>                                                                                           | (2) Lv et al. 2015      |
| <b>plv-dCas9-R0</b>         | CRISPRi recombinant plasmid, sgRNA R0, CM <sup>R</sup>                                                                             | This study              |
| <b>plv-dCas9-R1</b>         | CRISPRi recombinant plasmid, sgRNA R1, CM <sup>R</sup>                                                                             | This study              |
| <b>plv-dCas9-R2</b>         | CRISPRi recombinant plasmid, sgRNA R2, CM <sup>R</sup>                                                                             | This study              |
| <b>plv-dCas9-R3</b>         | CRISPRi recombinant plasmid, sgRNA R3, CM <sup>R</sup>                                                                             | This study              |
| <b>plv-dCas9-R4</b>         | CRISPRi recombinant plasmid, sgRNA R4, CM <sup>R</sup>                                                                             | This study              |
| <b>plv-dCas9-R5</b>         | CRISPRi recombinant plasmid, sgRNA R5, CM <sup>R</sup>                                                                             | This study              |
| <b>plv-dCas9-R6</b>         | CRISPRi recombinant plasmid, sgRNA R6, CM <sup>R</sup>                                                                             | This study              |
| <b>pET-28a</b>              | Cloning vector, KAN <sup>R</sup>                                                                                                   | Novagen                 |
| <b>pE<sub>tac</sub>-28a</b> | pET-28a with original T7 promoter replaced by <i>tac</i> promoter, KAN <sup>R</sup>                                                | This study              |
| <b>ptacINT</b>              | pE <sub>tac</sub> -28a with <i>intI1</i> gene overexpressing under <i>tac</i> promoter, KAN <sup>R</sup>                           | This study              |
| <b>pINT-<i>aadA1</i></b>    | ptacINT with <i>aadA1</i> cassette added, KAN <sup>R</sup>                                                                         | This study              |
| <b>pINT-<i>aadB</i></b>     | ptacINT with <i>aadB</i> cassette added, KAN <sup>R</sup>                                                                          | This study              |
| <b>R388-<i>aadA1</i></b>    | R388 with <i>aadA1</i> cassette inserted, TMP <sup>R</sup> , SUL <sup>R</sup> , STR <sup>R</sup>                                   | This study              |
| <b>R388-<i>aadB</i></b>     | R388 with <i>aadB</i> cassette inserted, TMP <sup>R</sup> , SUL <sup>R</sup> , GEN <sup>R</sup>                                    | This study              |
| <b>Strains</b>              |                                                                                                                                    |                         |

---

|                                                                 |                                                                                                                                        |            |
|-----------------------------------------------------------------|----------------------------------------------------------------------------------------------------------------------------------------|------------|
| <b><i>E. coli</i> C600</b>                                      | Wild-type strain, F <sup>+</sup> <i>tonA21 thi<sup>1</sup> thr<sup>-1</sup> leuB6</i><br><i>lacY1 glnV44 rfbC1 fhuA1 λ<sup>-</sup></i> | Lab stock  |
| <b><i>E. coli</i> Top10</b>                                     | Competent cells                                                                                                                        | Biomed     |
| <b><i>E. coli</i> DH5α(R388)</b>                                | <i>E. coli</i> DH5α carrying plasmid R388                                                                                              | Lab stock  |
| <b><i>E. coli</i> ATCC 25922</b>                                | Quality control strain for determination of<br>antibiotic resistance                                                                   | ATCC       |
| <b><i>Salmonella</i> sp.S084</b>                                | Wild-type strain of <i>aadB</i> cassette                                                                                               | Lab stock  |
| <b><i>Salmonella</i> sp.S010</b>                                | Wild-type strain of <i>aadA1</i> cassette                                                                                              | Lab stock  |
| <b><i>E. coli</i> C600(R388+plv-dCas9-R0)</b>                   | Recombinant <i>E. coli</i> C600 carrying R388 and<br>plv-dCas9-R0                                                                      | This study |
| <b><i>E. coli</i> C600(R388+plv-dCas9-R1)</b>                   | Recombinant <i>E. coli</i> C600 carrying R388 and<br>plv-dCas9-R1                                                                      | This study |
| <b><i>E. coli</i> C600(R388+plv-dCas9-R2)</b>                   | Recombinant <i>E. coli</i> C600 carrying R388 and<br>plv-dCas9-R2                                                                      | This study |
| <b><i>E. coli</i> C600(R388+plv-dCas9-R3)</b>                   | Recombinant <i>E. coli</i> C600 carrying R388 and<br>plv-dCas9-R3                                                                      | This study |
| <b><i>E. coli</i> C600(R388+plv-dCas9-R4)</b>                   | Recombinant <i>E. coli</i> C600 carrying R388 and<br>plv-dCas9-R4                                                                      | This study |
| <b><i>E. coli</i> C600(R388+plv-dCas9-R5)</b>                   | Recombinant <i>E. coli</i> C600 carrying R388 and<br>plv-dCas9-R5                                                                      | This study |
| <b><i>E. coli</i> C600(R388+plv-dCas9-R6)</b>                   | Recombinant <i>E. coli</i> C600 carrying R388 and<br>plv-dCas9-R6                                                                      | This study |
| <b><i>E. coli</i> C600(R388+plv-dCas9-R0+pINT-<i>aadA1</i>)</b> | Donor <i>E. coli</i> C600 carrying R388,<br>plv-dCas9-R0 and pINT- <i>aadA1</i>                                                        | This study |
| <b><i>E. coli</i> C600(R388+plv-dCas9-R1+pINT-<i>aadA1</i>)</b> | Donor <i>E. coli</i> C600 carrying R388,<br>plv-dCas9-R1 and pINT- <i>aadA1</i>                                                        | This study |
| <b><i>E. coli</i> C600(R388+plv-dCas9-R2+pINT-<i>aadA1</i>)</b> | Donor <i>E. coli</i> C600 carrying R388,<br>plv-dCas9-R2 and pINT- <i>aadA1</i>                                                        | This study |

---



|                                                          |                                                                              |            |
|----------------------------------------------------------|------------------------------------------------------------------------------|------------|
| <b><i>E. coli</i> C600(R388+plv-dCas9-R3+pINT-aadA1)</b> | Donor <i>E. coli</i> C600 carrying R388, plv-dCas9-R3 and pINT- <i>aadA1</i> | This study |
| <b><i>E. coli</i> C600(R388+plv-dCas9-R4+pINT-aadA1)</b> | Donor <i>E. coli</i> C600 carrying R388, plv-dCas9-R4 and pINT- <i>aadA1</i> | This study |
| <b><i>E. coli</i> C600(R388+plv-dCas9-R5+pINT-aadA1)</b> | Donor <i>E. coli</i> C600 carrying R388, plv-dCas9-R5 and pINT- <i>aadA1</i> | This study |
| <b><i>E. coli</i> C600(R388+plv-dCas9-R6+pINT-aadA1)</b> | Donor <i>E. coli</i> C600 carrying R388, plv-dCas9-R6 and pINT- <i>aadA1</i> | This study |
| <b><i>E. coli</i> C600(R388+plv-dCas9-R0+pINT-aadB)</b>  | Donor <i>E. coli</i> C600 carrying R388, plv-dCas9-R0 and pINT- <i>aadB</i>  | This study |
| <b><i>E. coli</i> C600(R388+plv-dCas9-R1+pINT-aadB)</b>  | Donor <i>E. coli</i> C600 carrying R388, plv-dCas9-R1 and pINT- <i>aadB</i>  | This study |
| <b><i>E. coli</i> C600(R388+plv-dCas9-R2+pINT-aadB)</b>  | Donor <i>E. coli</i> C600 carrying R388, plv-dCas9-R2 and pINT- <i>aadB</i>  | This study |
| <b><i>E. coli</i> C600(R388+plv-dCas9-R3+pINT-aadB)</b>  | Donor <i>E. coli</i> C600 carrying R388, plv-dCas9-R3 and pINT- <i>aadB</i>  | This study |
| <b><i>E. coli</i> C600(R388+plv-dCas9-R4+pINT-aadB)</b>  | Donor <i>E. coli</i> C600 carrying R388, plv-dCas9-R4 and pINT- <i>aadB</i>  | This study |
| <b><i>E. coli</i> C600(R388+plv-dCas9-R5+pINT-aadB)</b>  | Donor <i>E. coli</i> C600 carrying R388, plv-dCas9-R5 and pINT- <i>aadB</i>  | This study |
| <b><i>E. coli</i> C600(R388+plv-dCas9-R6+pINT-aadB)</b>  | Donor <i>E. coli</i> C600 carrying R388, plv-dCas9-R6 and pINT- <i>aadB</i>  | This study |
| <b><i>E. coli</i> J53</b>                                | Wild-type recipient                                                          | Lab stock  |
| <b><i>E. coli</i> J53 (R388)</b>                         | Transconjugant <i>E. coli</i> J53 carrying R388                              | This study |
| <b><i>E. coli</i> J53 (R388-aadA1)</b>                   | Transconjugant <i>E. coli</i> J53 carrying R388- <i>aadA1</i>                | This study |
| <b><i>E. coli</i> J53 (R388-aadB)</b>                    | Transconjugant <i>E. coli</i> J53 carrying R388- <i>aadB</i>                 | This study |

51 TMP, trimethoprim; SUL, sulfamethoxazole; CM, chloramphenicol; KAN, kanamycin; STR, streptomycin;

52 GEN, gentamicin; ATCC, American type culture collection.

53 **Table S2 Oligonucleotides and primers used in this study.**

| <b>Primers</b>                                        | <b>Sequences (5'-3')</b>                     | <b>Vectors</b> |
|-------------------------------------------------------|----------------------------------------------|----------------|
| <b>Oligonucleotides used for sgRNA synthesis</b>      |                                              |                |
| BspQI-R0-F                                            | aaaTTCGACGTGAACTTGGTACG                      | plv-dCas9-R0   |
| R0-BspQI-R                                            | aacCGTACCAAGTTCACGTCGAA                      |                |
| BspQI-R1-F                                            | aaaCCAGTTGACATAAGCCTGTT                      | plv-dCas9-R1   |
| R1-BspQI-R                                            | aacAACAGGCTTATGTCAACTGG                      |                |
| BspQI-R2-F                                            | aaaCACACCGTGGAAACGGATGA                      | plv-dCas9-R2   |
| R2-BspQI-R                                            | aacTCATCCGTTTCCACGGTGTG                      |                |
| BspQI-R3-F                                            | aaaAGAACCTTGACCGAACGCAG                      | plv-dCas9-R3   |
| R3-BspQI-R                                            | aacCTGCGTTCGGTCAAGGTTCT                      |                |
| BspQI-R4-F                                            | aaaGCTGCGTTCGGTCAAGGTTCT                     | plv-dCas9-R4   |
| R4-BspQI-R                                            | aacGAACCTTGACCGAACGCAGC                      |                |
| BspQI-R5-F                                            | aaaCGTGCCTTCATCCGTTTCCA                      | plv-dCas9-R5   |
| R5-BspQI-R                                            | aacTGGAAACGGATGAAGGCACG                      |                |
| BspQI-R6-F                                            | aaaCCGAACAGGCTTATGTCAAC                      | plv-dCas9-R6   |
| R6-BspQI-R                                            | aacGTTGACATAAGCCTGTTCCG                      |                |
| <b>Primers used for construction of pINT-cassette</b> |                                              |                |
| NdeI-intI1-F                                          | attactaacaacatatgAAAACCGCCACTGCGCC<br>GTTACC | ptacINT        |
| intI1-XhoI-R                                          | tatactcgagCTACCTCTCACTAGTGAGGGG<br>CGGC      |                |
| BglII-aadA1-F                                         | aatagatctGGTTAACAAGTGGCAGC                   | pINT-aadA1     |
| aadA1-BmgBI-R                                         | acaagatctGACCTGATAGTTTGGCTG                  |                |
| BglII-aadB-F                                          | cgtagatctAAGCAGCAAGCGCGTTA                   | pINT-aadB      |
| aadB-BmgBI-R                                          | ataagatctGGCCGAGCGCTGGAATA                   |                |
| <b>Primers used for colony PCR</b>                    |                                              |                |
| BspQI-R0-F                                            | aaaTTCGACGTGAACTTGGTACG                      | plv-dCas9-R0   |

---

|                                        |                                        |                    |
|----------------------------------------|----------------------------------------|--------------------|
| sgRNA-CX-R                             | GCGGAATATATCCCTAGGCCTGCAG              |                    |
| BspQI-R1-F                             | aaaCCAGTTGACATAAGCCTGTT                | plv-dCas9-R1       |
| sgRNA-CX-R                             | GCGGAATATATCCCTAGGCCTGCAG              |                    |
| BspQI-R2-F                             | aaaCACACCGTGGAACGGATGA                 | plv-dCas9-R2       |
| sgRNA-CX-R                             | GCGGAATATATCCCTAGGCCTGCAG              |                    |
| BspQI-R3-F                             | aaaAGAACCTTGACCGAACGCAG                | plv-dCas9-R3       |
| sgRNA-CX-R                             | GCGGAATATATCCCTAGGCCTGCAG              |                    |
| BspQI-R4-F                             | aaaGCTGCGTTCGGTCAAGGTTC                | plv-dCas9-R4       |
| sgRNA-CX-R                             | GCGGAATATATCCCTAGGCCTGCAG              |                    |
| BspQI-R5-F                             | aaaCGTGCCTTCATCCGTTTCCA                | plv-dCas9-R5       |
| sgRNA-CX-R                             | GCGGAATATATCCCTAGGCCTGCAG              |                    |
| BspQI-R6-F                             | aaaCCGAACAGGCTTATGTCAAC                | plv-dCas9-R6       |
| sgRNA-CX-R                             | GCGGAATATATCCCTAGGCCTGCAG              |                    |
| intI1-F                                | TGATGGCGACGCACGACA                     | R388               |
| intI1-R                                | TCCTGGCTGGCGAACGAG                     |                    |
| BglII-aadA1-F                          | aatagatctGGTTAACAAGTGGCAGC             | pINT- <i>aadA1</i> |
| intI1-CX-R                             | ATCCGGATATAGTTCCTCCTTTCAGCA<br>AAAAACC |                    |
| BglII-aadB-F                           | cgtagatctAAGCAGCAAGCGCGTTA             | pINT- <i>aadB</i>  |
| intI1-CX-R                             | ATCCGGATATAGTTCCTCCTTTCAGCA<br>AAAAACC |                    |
| <b>Primers used for DNA sequencing</b> |                                        |                    |
| sgRNA-CX-F                             | TGTTTGTCTGGTGAACGCTCTCTACTAG           | plv-dCas9-R(0-6)   |
| sgRNA-CX-R                             | GCGGAATATATCCCTAGGCCTGCAG              |                    |
| intI1-CX-F                             | GAAGGATATACCATGGGCAGCAGCC              | ptacINT            |
| intI1-CX-R                             | ATCCGGATATAGTTCCTCCTTTCAGCA<br>AAAAACC |                    |
| Cassette-CX-F                          | GGCTGCTGCCCATGGTATATCCTTC              | pINT-cassette      |

---

---

|                                 |                           |                        |
|---------------------------------|---------------------------|------------------------|
| Cassette-CX-R                   | CACCATACCCACGCCGAAACAAGCG |                        |
| Integration-CX-F                | ACGAACCCAGTTGACATAAG      |                        |
| aadA1-CX-R                      | TCGATGACGCCAACTAC         | R388- <i>aadA1</i>     |
| Integration-CX-F                | ACGAACCCAGTTGACATAAG      |                        |
| aadB-CX-R                       | GGCAGATTTGCTCATCTG        | R388- <i>aadB</i>      |
| <b>Primers used for RT-qPCR</b> |                           |                        |
| 16S rRNA-RT-F                   | CCTACGGGAGGCAGCAG         | -                      |
| 16S rRNA-RT-R                   | ATTACCGCGGCTGCTGG         |                        |
| dCas9-RT-F                      | TGGTGAAGAAGACAAGAA        | plv-dCas9-R(0-6)       |
| dCas9-RT-R                      | CGCAGATGATAGATAGTTGGA     |                        |
| intI1-RT-F                      | ATCGTTTGTTCGCCAGCTT       | pINT-cassette and R388 |
| intI1-RT-R                      | GTGCCGTGATCGAAATCCAG      |                        |
| drfB2-RT-F                      | AGAAATCTGGTGCCGCTTG       | R388                   |
| drfB2-RT-R                      | ACTGAGCCTGGGTGGGATT       |                        |
| sul1-RT-F                       | ACGGTGTTCCGCATTCTGA       | R388                   |
| sul1-RT-R                       | TCCGACTCGCAGCATTTC        |                        |

---

54 Primers were designed by Primer Premier 5.0 software using sequences downloaded from NCBI  
55 (<http://www.ncbi.nlm.nih.gov/>) as templates. The nucleotides labeled with gray background are the  
56 restriction endonuclease sites.

57 **Table S3 IC<sub>50</sub> of TMP and SUL in recombinant *E. coli* with/without aTc induction.**

| Strains                                | aTc | IC <sub>50</sub> of TMP (µg/ml) | IC <sub>50</sub> of SUL (µg/ml) |
|----------------------------------------|-----|---------------------------------|---------------------------------|
| <i>E. coli</i> ATCC25922               | -   | 2                               | 32                              |
| <i>E. coli</i> C600(R388)              | -   | 512                             | 4096                            |
| <i>E. coli</i> C600(R388+plv-dCas9-R0) | -   | 512                             | 4096                            |
|                                        | +   | 512                             | 4096                            |
| <i>E. coli</i> C600(R388+plv-dCas9-R1) | -   | 512                             | 4096                            |
|                                        | +   | 64                              | 1024                            |
| <i>E. coli</i> C600(R388+plv-dCas9-R2) | -   | 512                             | 4096                            |
|                                        | +   | 64                              | 256                             |
| <i>E. coli</i> C600(R388+plv-dCas9-R3) | -   | 512                             | 4096                            |
|                                        | +   | 64                              | 128                             |
| <i>E. coli</i> C600(R388+plv-dCas9-R4) | -   | 512                             | 4096                            |
|                                        | +   | 64                              | 2048                            |
| <i>E. coli</i> C600(R388+plv-dCas9-R5) | -   | 512                             | 4096                            |
|                                        | +   | 64                              | 2048                            |
| <i>E. coli</i> C600(R388+plv-dCas9-R6) | -   | 512                             | 4096                            |
|                                        | +   | 64                              | 128                             |

58 IC<sub>50</sub>, half-maximal inhibitory concentration; TMP, trimethoprim; SUL, sulfamethoxazole; aTc,  
59 anhydrotetracycline.

- 60 1. Stokes HW, Hall RM. 1989. A novel family of potentially mobile DNA elements encoding site-  
61 specific gene-integration functions: integrons. *Mol Microbiol* 3:1699-1683.
- 62 2. Lv L, Ren YL, Chen JC, Wu Q, Chen GQ. 2015. Application of CRISPRi for prokaryotic  
63 metabolic engineering involving multiple genes, a case study: controllable P(3HB-co-4HB)  
64 biosynthesis. *Metab Eng* 29:160-8.
- 65
